# Supplementary material for: AQP8 promotes glioma proliferation and growth, possibly through the ROS/PTEN/AKT signaling pathway
Source: Springer Nature journal article supplement (doi:10.1186/s12885-023-11025-8), 2023-06-06

1.Exposure conditions: Use Image Lab software for automatic exposure, no artificial adjustment to the exposure value.

2.The whole membrane Information:

A172:

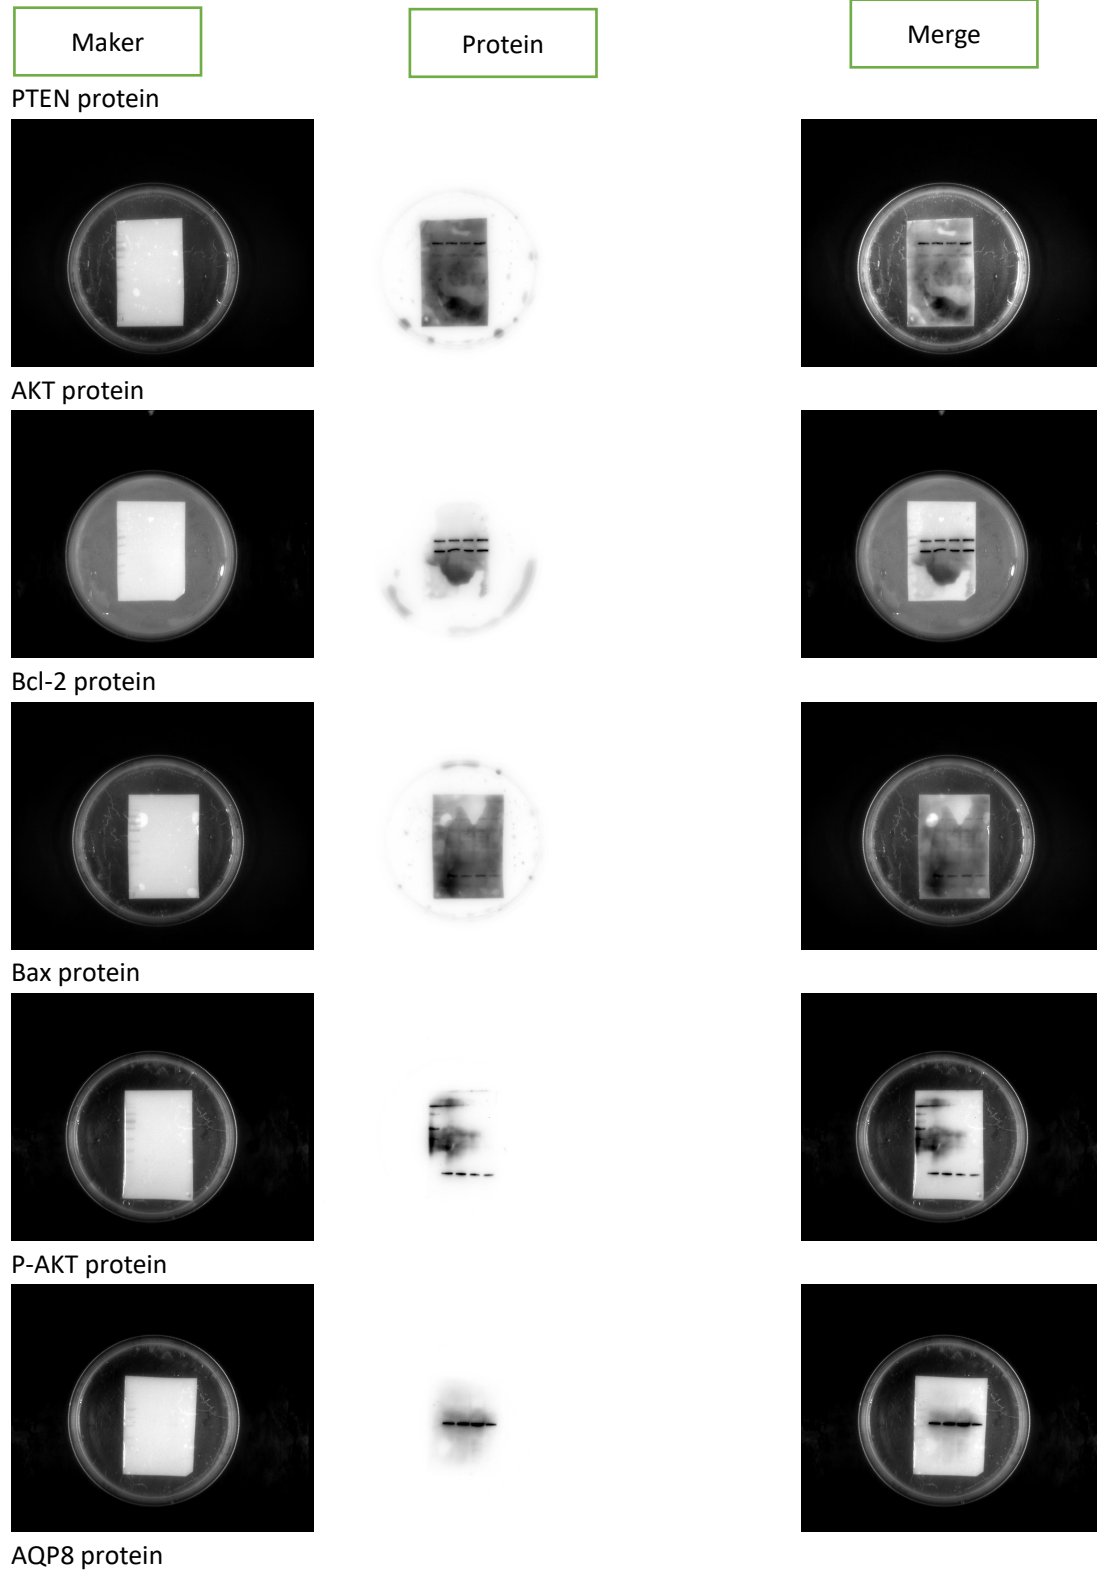

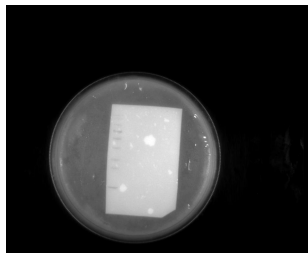

$\beta$ -actin protein

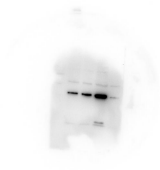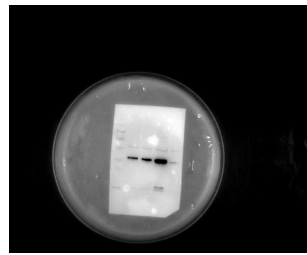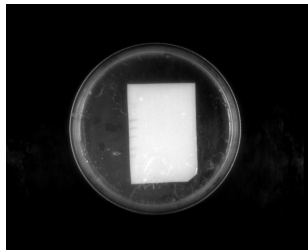

U251:  
PTEN protein

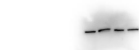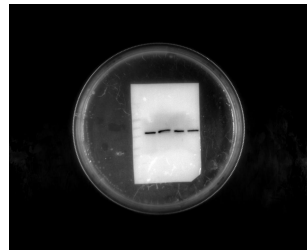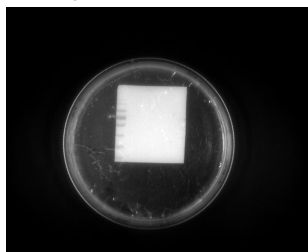

AKT protein

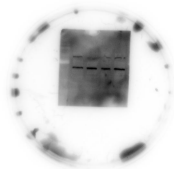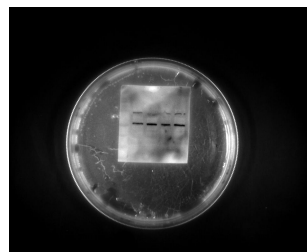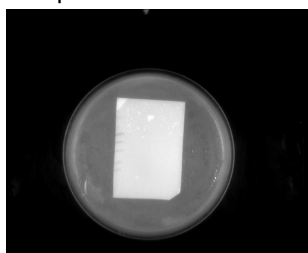

P-AKT protein

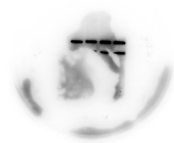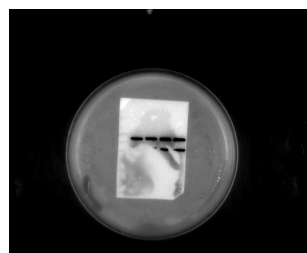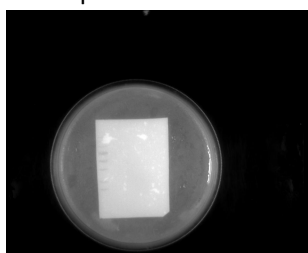

Bcl-2 protein

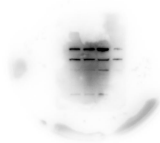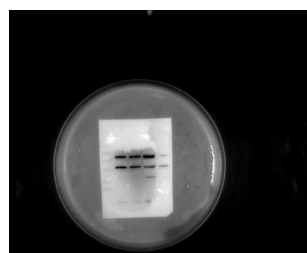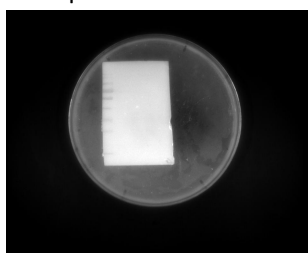

Bax protein

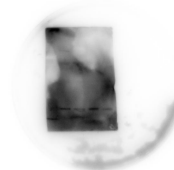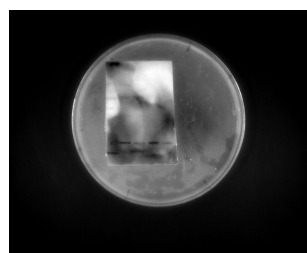

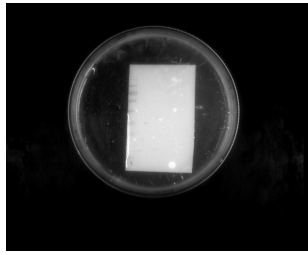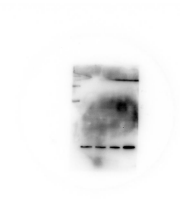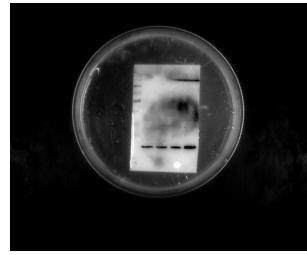

AQP8 protein

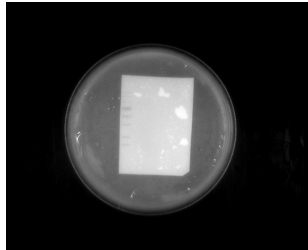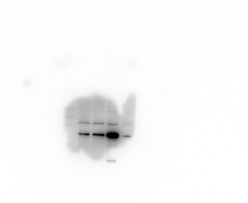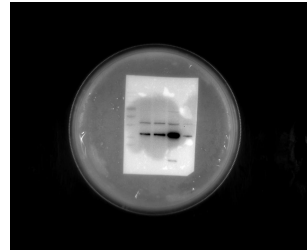

$\beta$ -actin protein

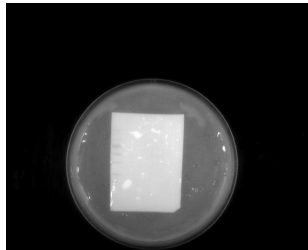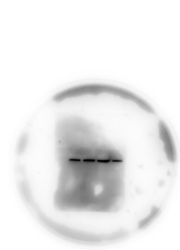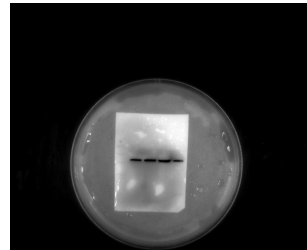

Supplement: MOESM1 [file 25455540]
