# Supplementary material for: AQP8 promotes glioma proliferation and growth, possibly through the ROS/PTEN/AKT signaling pathway
Source: Springer Nature journal article supplement (doi:10.1186/s12885-023-11025-8), 2023-06-06

## Supplemental information

WB: expression of AQP8 in U87, A172 and U251 cell lines

1. original imagines of all blots for AQP8 on Fig1A in the manuscript:

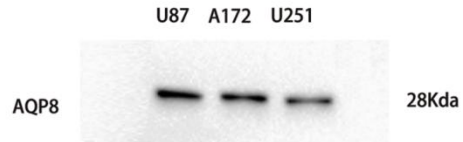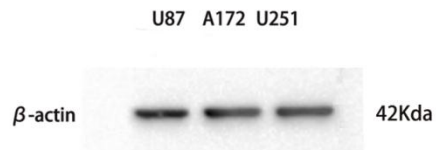

2. WB replicate:

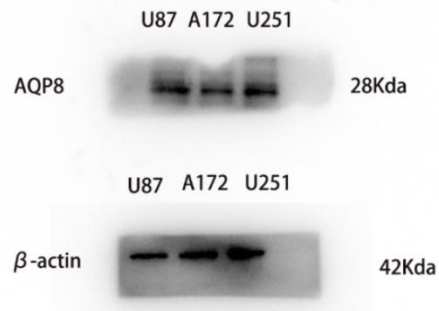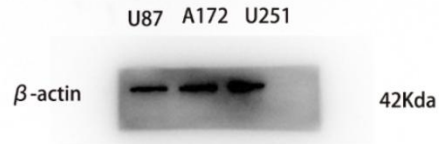

3. WB replicate:

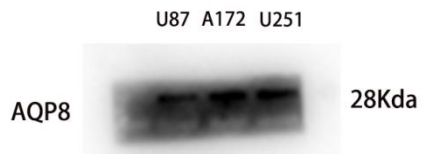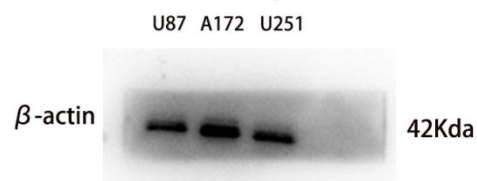

**qPCR:** amplification and melt curves of qPCR for AQP8 mRNA in all groups of A172 and U251, were divided into: a control group, a negative control group, three overexpression groups, three knock-down groups.

1. A172:

1.1 amplification curve of AQP8 mRNA:

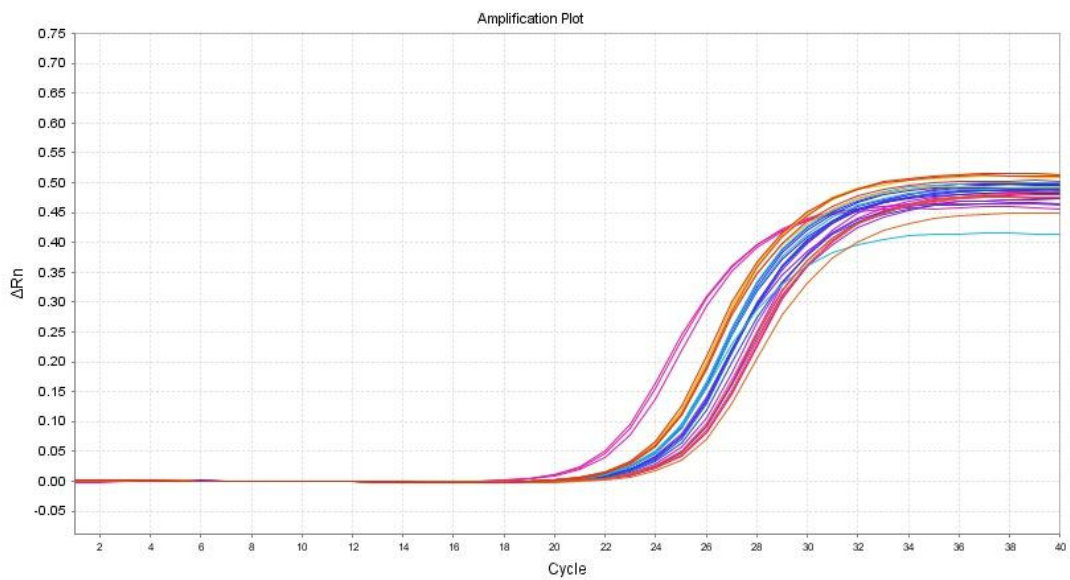

1.2 amplification curve of  $\beta$ -actin mRNA:

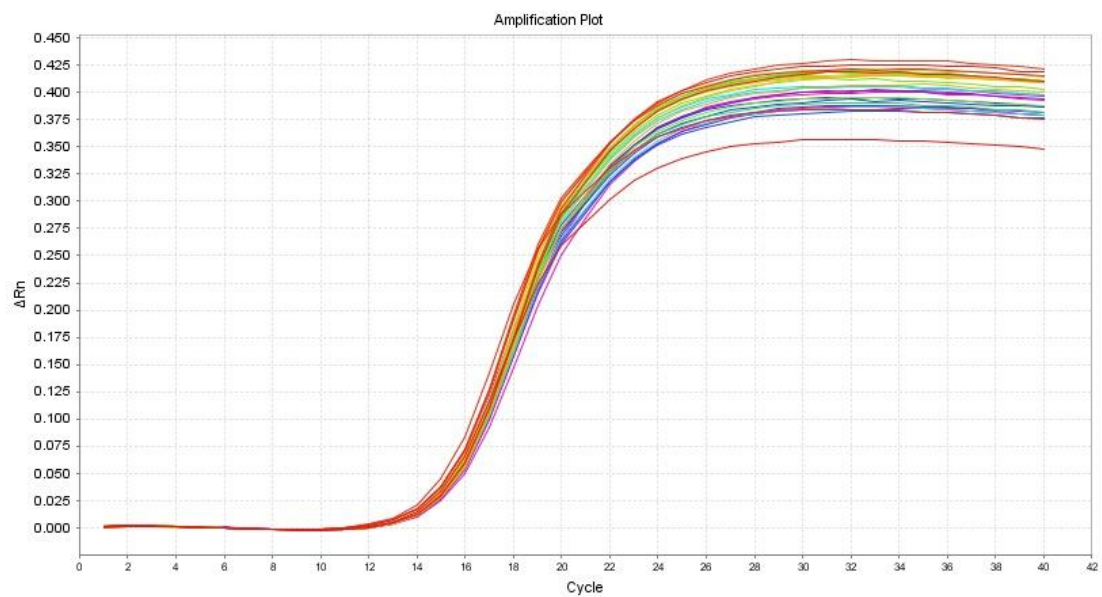

1.3 melt curve of AQP8 mRNA :

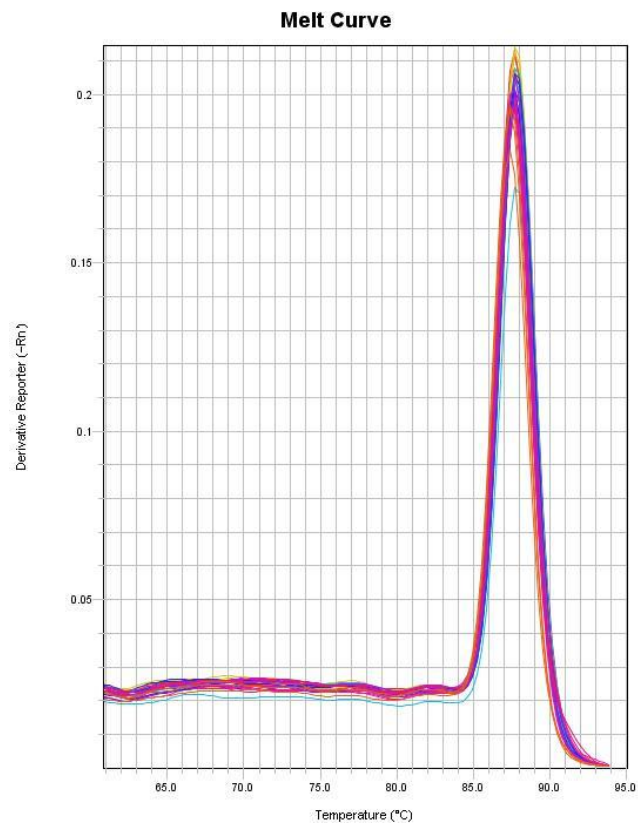

1.4 melt curve of  $\beta$ -actin mRNA :

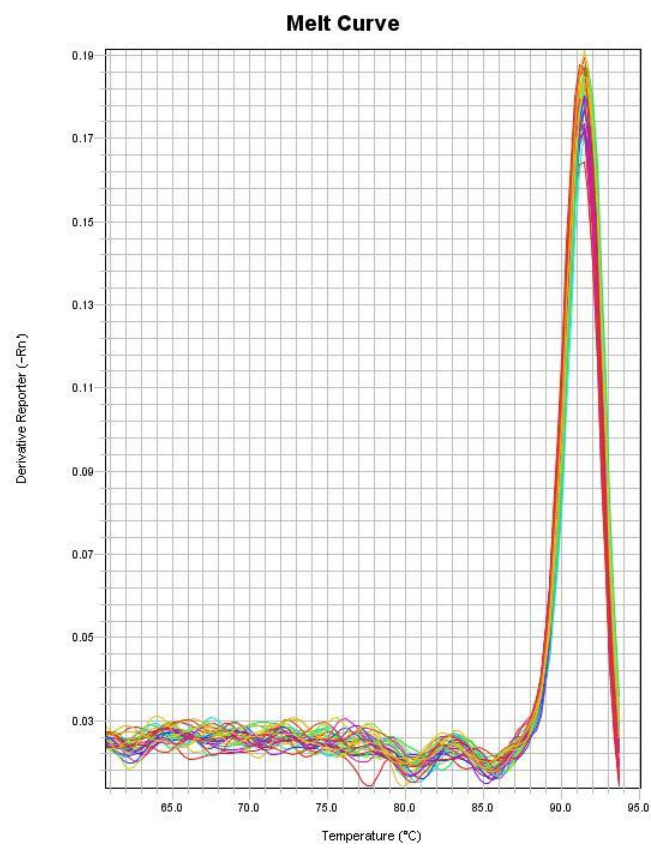

## 2. U251:

### 2.1 amplification curve of AQP8 mRNA:

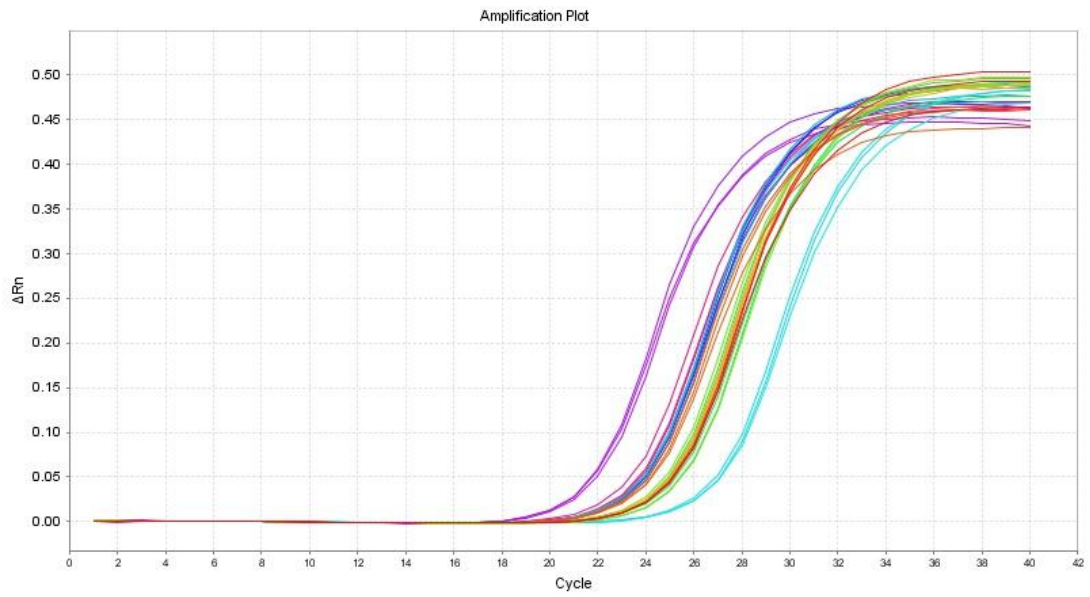

### 2.2 amplification curve of $\beta$ -actin mRNA:

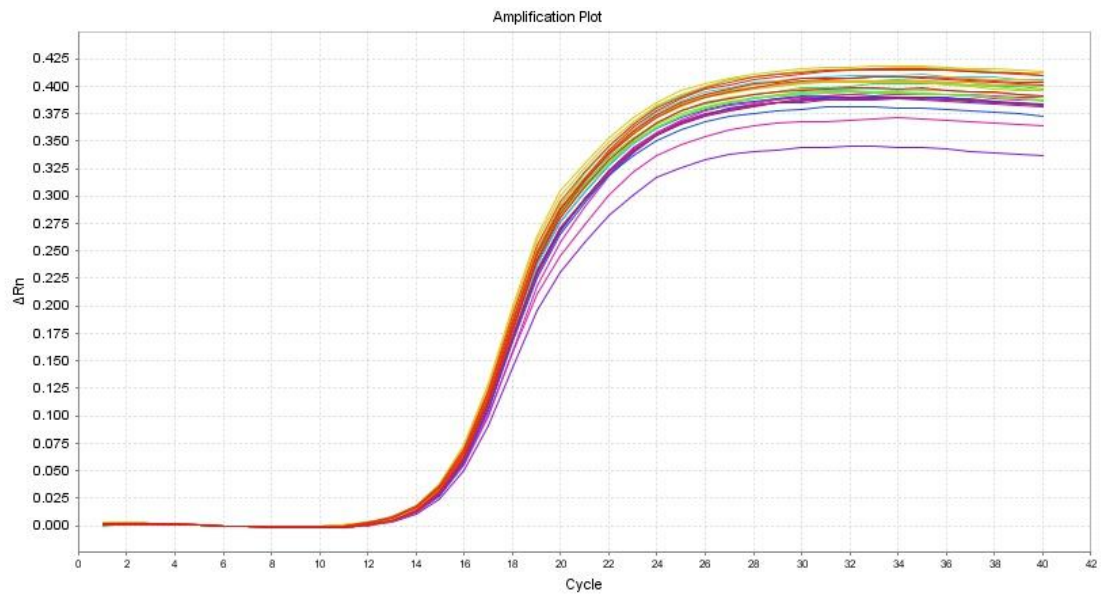

### 2.3 melt curve of AQP8 mRNA:

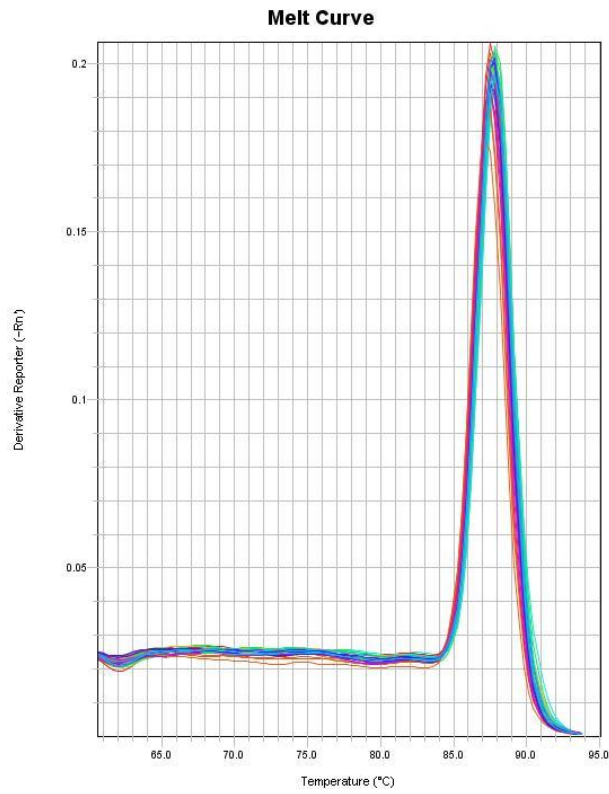

### 2.4 melt curve of $\beta$ -actin mRNA:

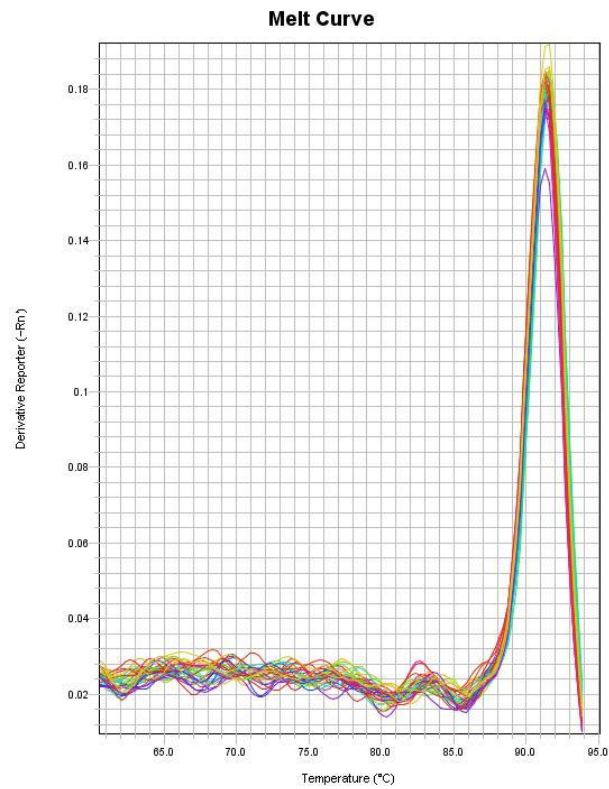

Supplement: MOESM2 [file 25455540]
