# Supplementary material for: AQP8 promotes glioma proliferation and growth, possibly through the ROS/PTEN/AKT signaling pathway
Source: Springer Nature journal article supplement (doi:10.1186/s12885-023-11025-8), 2023-06-06

Supplemental materials

All original images of all blots, with full length, membrane boundary visible for Fig1E,F and Fig6A,D,F,I in the manuscript as below.

Fig1-E:

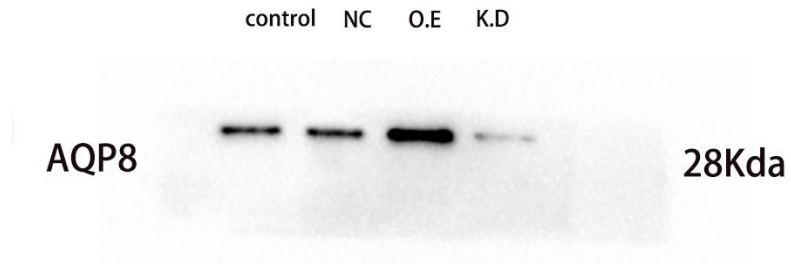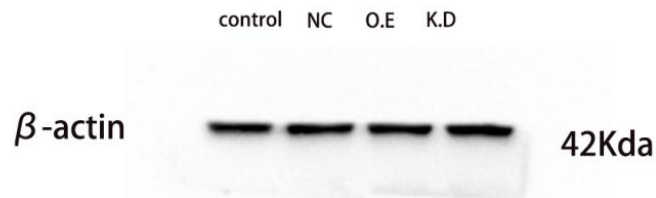

Fig1-F:

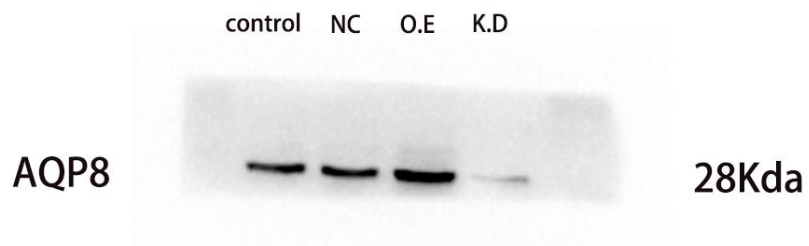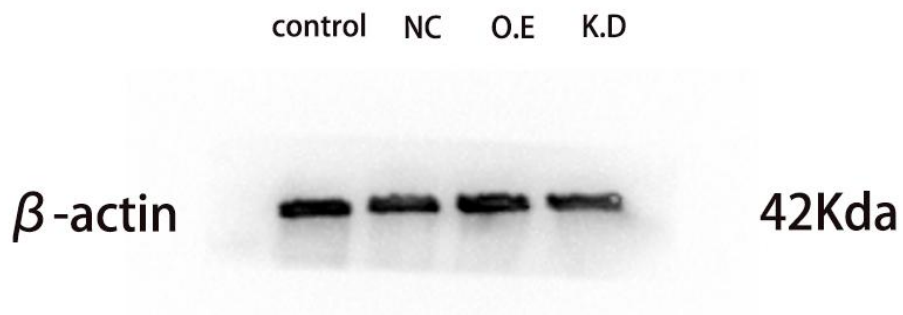

Fig6-A:

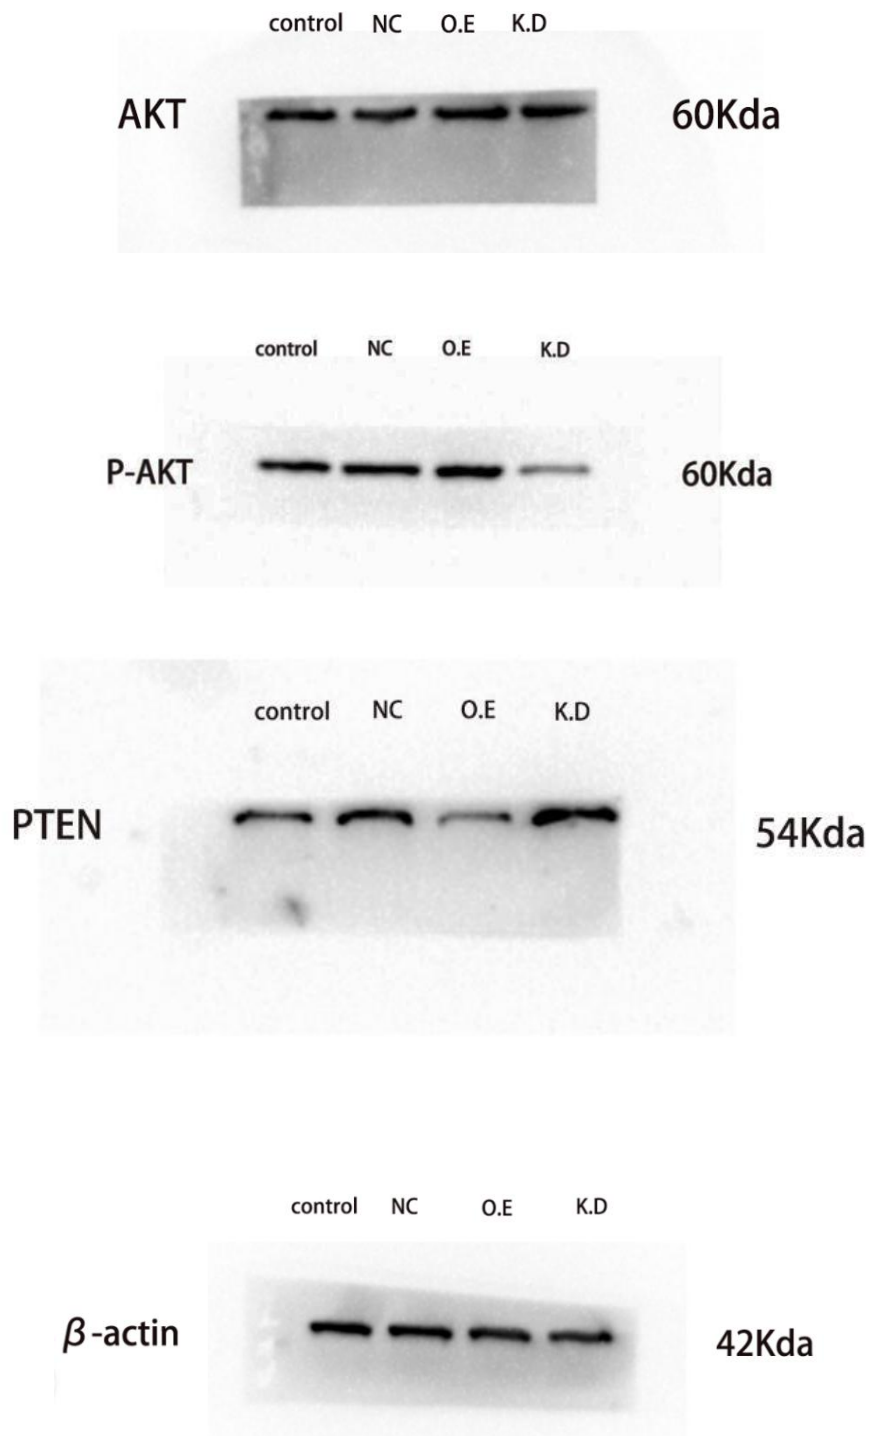

Fig6-D:

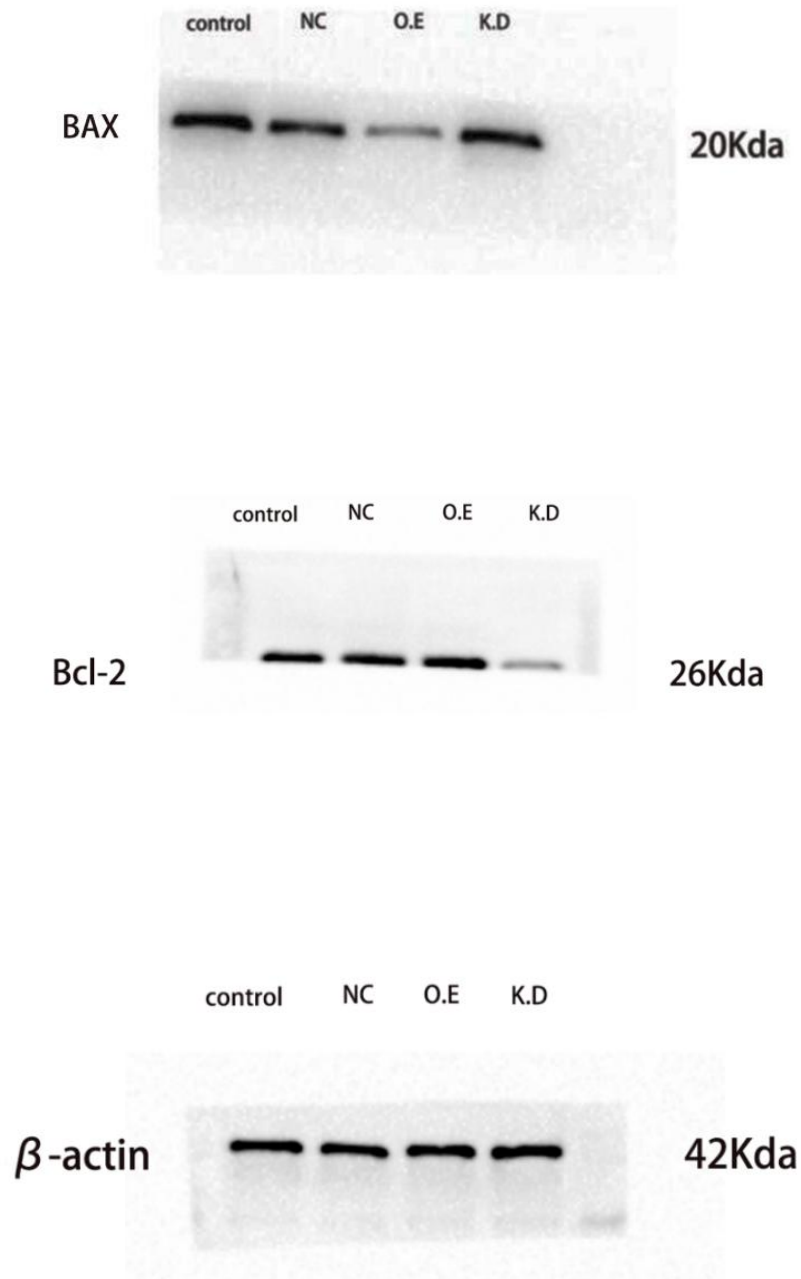

Fig6-F:

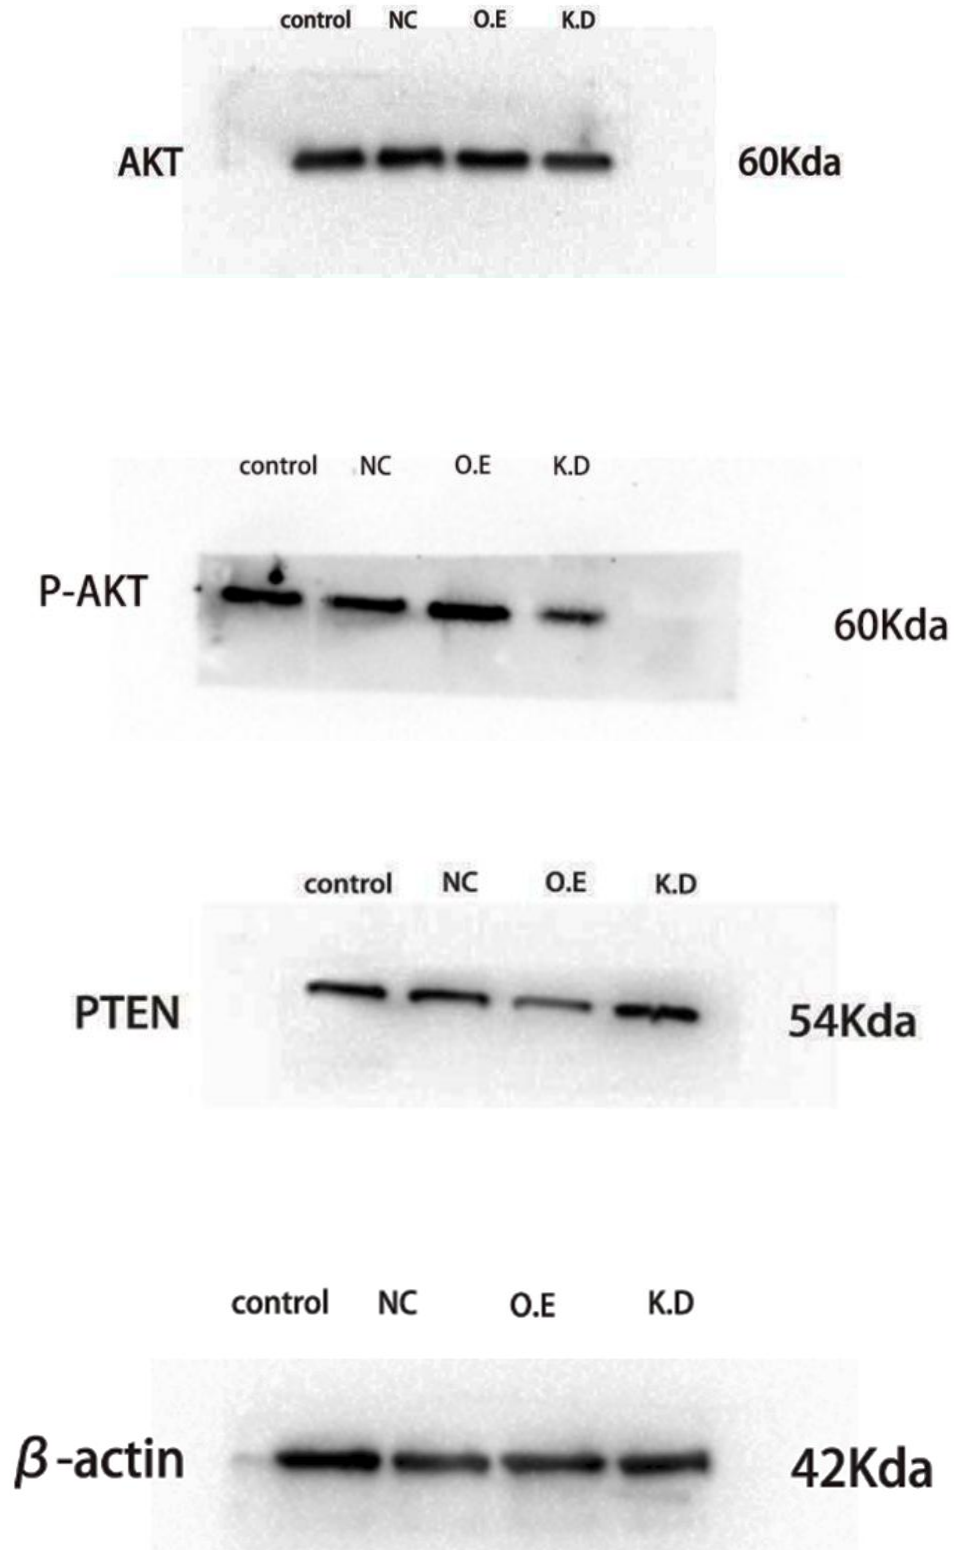

Fig6-I:

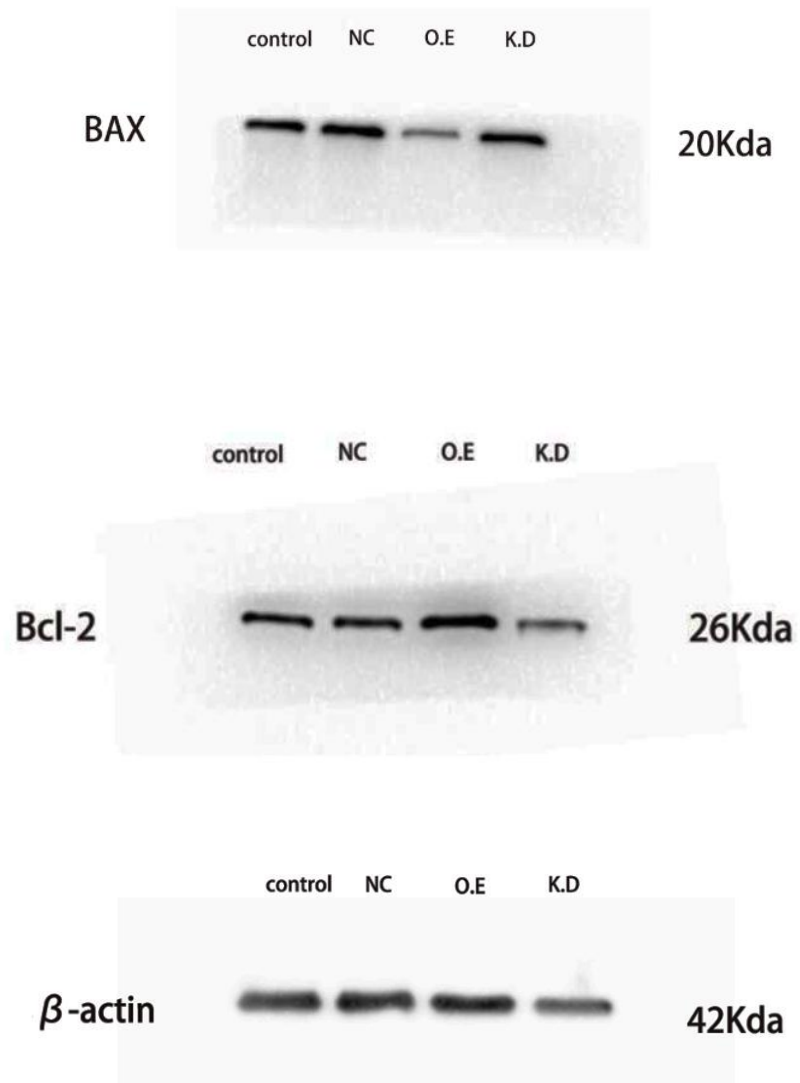

Supplement: MOESM3 [file 25455540]
